# Supplementary material
Source: publisher figshare collection journal article supplement (https://acs.figshare.com/ndownloader/files/18519896)
Supplement: Supplementary file 1 [file 18519896]

## Sheet: 工作表1
Colony #	MIC (μM)			Transposon insertion site	Drug pressure
	INH	JSF-2164	pretomanid
Rv	0.16	7.8	0.08	-	-
1	0.16	>125	> 40	fgd1 (rv0407)	5x
2	0.16	>125	> 40	fgd1 (rv0407)
3	0.16	>125	> 40	fgd1 (rv0407)
4	0.16	>125	> 40	fgd1 (rv0407)
5	0.16	>125	> 40	fgd1 (rv0407)
6	0.16	>125	> 40	fgd1 (rv0407)
7	0.16	>125	> 40	rv3312c
8	0.16	>125	> 40	rv3312c
9	0.16	>125	> 40	fgd1 (rv0407)
10	0.16	>125	> 40	fgd1 (rv0407)
11	0.16	>125	> 40	fgd1 (rv0407)
12	0.16	>125	> 40	fgd1 (rv0407)
13	0.16	>125	> 40	fgd1 (rv0407)
14	0.16	>125	> 40	fgd1 (rv0407)
15	0.16	>125	> 40	fgd1 (rv0407)
16	0.16	16	0.08	fgd1 (rv0407)
17	0.16	>125	> 40	fgd1 (rv0407)
18	0.16	>125	> 40	fgd1 (rv0407)
19	0.16	>125	> 40	fgd1 (rv0407)	5x
20	0.16	>125	> 40	fgd1 (rv0407)
21	0.16	>125	> 40	fgd1 (rv0407)
22	0.16	>125	> 40	fgd1 (rv0407)
23	0.16	>125	> 40	fgd1 (rv0407)
24	0.16	>125	> 40	fgd1 (rv0407)
25	0.16	>125	> 40	fgd1 (rv0407)
26	0.16	>125	> 40	fgd1 (rv0407)
27	0.16	>125	> 40	fgd1 (rv0407)
28	0.16	>125	> 40	fgd1 (rv0407)
29	0.16	>125	> 40	fgd1 (rv0407)
30	0.16	>125	> 40	fgd1 (rv0407)
31	0.16	>125	> 40	pta (rv0408)
32	0.16	>125	> 40	fgd1 (rv0407)
33	0.16	>125	> 40	fgd1 (rv0407)
34	0.16	>125	> 40	fgd1 (rv0407)
35	0.16	>125	> 40	fgd1 (rv0407)
36	0.16	>125	> 40	fgd1 (rv0407)
37	0.16	>125	> 40	fgd1 (rv0407)
38	0.16	>125	> 40	fgd1 (rv0407)
39	0.16	>125	> 40	fgd1 (rv0407)
40	0.16	>125	> 40	fgd1 (rv0407)
41	0.16	>125	> 40	fgd1 (rv0407)
42	0.16	>125	> 40	fgd1 (rv0407)
43	0.16	>125	> 40	fgd1 (rv0407)
44	0.16	>125	> 40	rv1534
45	0.16	>125	> 40	rv1534
46	0.16	>125	> 40	fgd1 (rv0407)
47	0.16	>125	> 40	fgd1 (rv0407)
48	0.16	>125	> 40	fgd1 (rv0407)
49	0.078	>125	40	fgd1 (rv0407)
50	0.16	>125	40	fgd1 (rv0407)
51	0.078	125	40	fgd1 (rv0407)
52	0.078	125	40	fgd1 (rv0407)
53	0.078	125	> 40	fgd1 (rv0407)
54	0.078	125	40	fgd1 (rv0407)
55	0.078	125	> 40	fgd1 (rv0407)	30x
56	0.078	125	> 40	fgd1 (rv0407)
57	0.078	>125	> 40	fgd1 (rv0407)
58	0.16	>125	> 40	fgd1 (rv0407)
59	0.078	125	> 40	fgd1 (rv0407)
60	0.16	125	> 40	fgd1 (rv0407)
61	0.16	>125	> 40	fgd1 (rv0407)
62	0.16	>125	> 40	fgd1 (rv0407)	30x
63	0.16	>125	> 40	fgd1 (rv0407)
64	0.32	>125	> 40	alkB (rv3252c)
65	0.16	>125	> 40	fgd1 (rv0407)
66	0.16	>125	> 40	fgd1 (rv0407)
67	0.16	>125	> 40	fgd1 (rv0407)
68	0.16	>125	> 40	fgd1 (rv0407)
69	0.16	>125	> 40	fgd1 (rv0407)	20x
70	0.16	>125	> 40	fgd1 (rv0407)
71	0.16	>125	> 40	fgd1 (rv0407)
72	0.16	>125	> 40	fgd1 (rv0407)	10x
73	0.16	>125	> 40	fgd1 (rv0407)
74	0.16	>125	> 40	fgd1 (rv0407)
75	0.16	>125	> 40	fgd1 (rv0407)
76	0.16	>125	> 40	fgd1 (rv0407)
77	0.16	>125	> 40	fgd1 (rv0407)
78	0.16	>125	> 40	fgd1 (rv0407)	10x
79	0.16	>125	> 40	fgd1 (rv0407)
80	0.16	>125	> 40	fgd1 (rv0407)	30x
81	0.16	>125	> 40	fgd1 (rv0407)
82	0.16	>125	> 40	fgd1 (rv0407)
83	0.16	>125	> 40	fgd1 (rv0407)
84	0.16	>125	> 40	fgd1 (rv0407)
85	0.16	>125	> 40	fgd1 (rv0407)
86	0.16	>125	> 40	fgd1 (rv0407)	20x
87	0.16	>125	> 40	fgd1 (rv0407)
88	0.16	>125	> 40	fgd1 (rv0407)
89	0.16	>125	> 40	fgd1 (rv0407)
90	0.16	>125	> 40	fgd1 (rv0407)	20x
